# Supplementary material
Source: PubMed Central journal article supplement (PMC1887560)
Supplement: pnas_0702340104_3.pdf [file pnas_0702340104_3.pdf]

**Table 1. Accession numbers of sequences used in phylogenetic trees and alignments**

| Organism                                                  | CCB1                |           | CCB2 and CCB4       |           | CCB3 and other YGGT  |          |
|-----------------------------------------------------------|---------------------|-----------|---------------------|-----------|----------------------|----------|
| <i>Anabaena variabilis</i> ATCC 29413*                    | Anabaena            | 75907942  | Anabaena            | 75908100  | CCB3 Anabaena        | 75906740 |
|                                                           |                     |           |                     |           | Anabaena (a)         | 75909316 |
| <i>Arabidopsis thaliana</i> *                             | Arabidopsis         | 110742756 | CCB2 Arabidopsis    | 15242277  | CCB3 Arabidopsis     | 22327397 |
|                                                           |                     |           | CCB4 Arabidopsis    | 42562815  | Arabidopsis (a)      | 22326932 |
|                                                           |                     |           |                     |           | Arabidopsis (b)      | 15234345 |
|                                                           |                     |           |                     |           | Arabidopsis (c)      | 18397948 |
| <i>Bacillus cereus</i> ATCC 10987*                        |                     |           |                     |           | Bacillus cereus      | 42782991 |
| <i>Bacillus halodurans</i> C-125*                         |                     |           |                     |           | Bacillus halodurans  | 15615111 |
| <i>Bacillus subtilis</i> subsp. <i>Subtilis</i> str. 168* |                     |           |                     |           | Bacillus subtilis    | 16078604 |
| <i>Chlamydomonas reinhardtii</i> †                        | CCB1                | 185128    | CCB2                | 3151      | CCB3                 | 205830   |
|                                                           |                     |           | CCB4                | 205823    | Chlamydomonas (a)    | 1125     |
|                                                           |                     |           |                     |           | Chlamydomonas (b)    | 2636     |
|                                                           |                     |           |                     |           | Chlamydomonas (c)    | 28501‡   |
| <i>Crocospaera watsonii</i> WH 8501*                      | Crocospaera         | 67923215  | Crocospaera         | 67925852  |                      |          |
| <i>Cyanidioschyzon merolae</i> §                          | Cyanidioschyzon     | CMM306C   | Cyanidioschyzon     | CMO261C   | CCB3 Cyanidioschyzon | CMT057C  |
|                                                           |                     |           |                     |           | Cyanidioschyzon (a)  | CMC030C  |
|                                                           |                     |           |                     |           | Cyanidioschyzon (b)  | CMV083C  |
| <i>Nostoc punctiforme</i> PCC 73102*                      | Nostoc              | 23123893  | Nostoc              | 23127716  |                      |          |
| <i>Oryza sativa</i> ( <i>japonica</i> cultivar-group)*    | Oryza               | 113645219 | CCB2 Oryza          | 37536188  | CCB3 Oryza           | 34905892 |
|                                                           |                     |           | CCB4 Oryza          | 50929215  | Oryza (a)            | 50920327 |
|                                                           |                     |           |                     |           | Oryza (b)            | 50934755 |
| <i>Ostreococcus tauri</i> ¶                               | Ostreococcus        | 33436     | CCB2 Ostreococcus   | 34056     | CCB3 Ostreococcus    | 18684    |
|                                                           |                     |           | CCB4 Ostreococcus   | 18975     | Ostreococcus (a)     | 31171    |
|                                                           |                     |           |                     |           | Ostreococcus (b)     | 10497    |
| <i>Phaeodactylum tricornotum</i>                          | Phaeodactylum       | 40415     | Phaeodactylum       | 37679     | CCB3 Phaeodactylum   | 17613    |
|                                                           |                     |           |                     |           | Phaeodactylum (a)    | 37147    |
| <i>Populus trichocarpa</i> **                             | Populus             | 708084    | CCB2 Populus        | 701167    |                      |          |
|                                                           |                     |           | CCB4 Populus        | 832874    |                      |          |
| <i>Synechococcus elongatus</i> PCC 6301*                  | Synechococcus       | 56685822  | Synechococcus       | 56752426  | CCB3 Synechococcus   | 56752087 |
|                                                           |                     |           |                     |           | Synechococcus (a)    | 56751051 |
| <i>Synechocystis</i> sp. PCC 6803*                        | Synechocystis       | 16332307  | Synechocystis       | 16331001  | CCB3 Synechocystis   | 16331623 |
|                                                           |                     |           |                     |           | Synechocystis (a)    | 16329433 |
| <i>Thalassiosira pseudonana</i> ††                        | Thalassiosira       | 106539    | Thalassiosira       | 108280    | CCB3 Thalassiosira   | 102312   |
|                                                           |                     |           |                     |           | Thalassiosira (a)    | 108820   |
| <i>Thermosynechococcus elongatus</i> BP-1*                | Thermosynechococcus | 22298167  | Thermosynechococcus | 22298227  |                      |          |
| <i>Trichodesmium erythraeum</i> IMS101*                   | Trichodesmium       | 113477358 | Trichodesmium       | 113474755 |                      |          |

\* gi numbers for these protein sequences are available at the National Center for Biotechnology website, [www.ncbi.nlm.nih.gov](http://www.ncbi.nlm.nih.gov).

†Protein ID codes for these sequences are available at the *Chlamydomonas* genome site, <http://genome.jgi-psf.org/Chlre3>.

‡The model is to correct by insertion after Arg-44 of AARLPPRIVSLPRYPVAAIIPGDSTAELVLTNGLYNFL, that was unsequenced in Chlre3 genome and present in cDNAs.

§Gene name for these sequences are available at the *Cyanidioschyzon* genome site, <http://merolae.biol.s.u-tokyo.ac.jp>.

¶Protein ID codes for these sequences are available at the *Ostreococcus* genome site, <http://genome.jgi-psf.org/Ostta4>.

|| protein ID codes for these sequences are available at the *Phaeodactylum* genome site, <http://genome.jgi-psf.org/Phatr1>.

\*\*Protein ID codes for these sequences are available at the *Populus* genome site, [http://genome.jgi-psf.org/Poptr1\\_1](http://genome.jgi-psf.org/Poptr1_1).

††Protein ID codes for these sequences are available at the *Thalassiosira* genome site, <http://genome.jgi-psf.org/Thaps1>.
