# Supplementary material
Source: PubMed Central journal article supplement (PMC1887560)

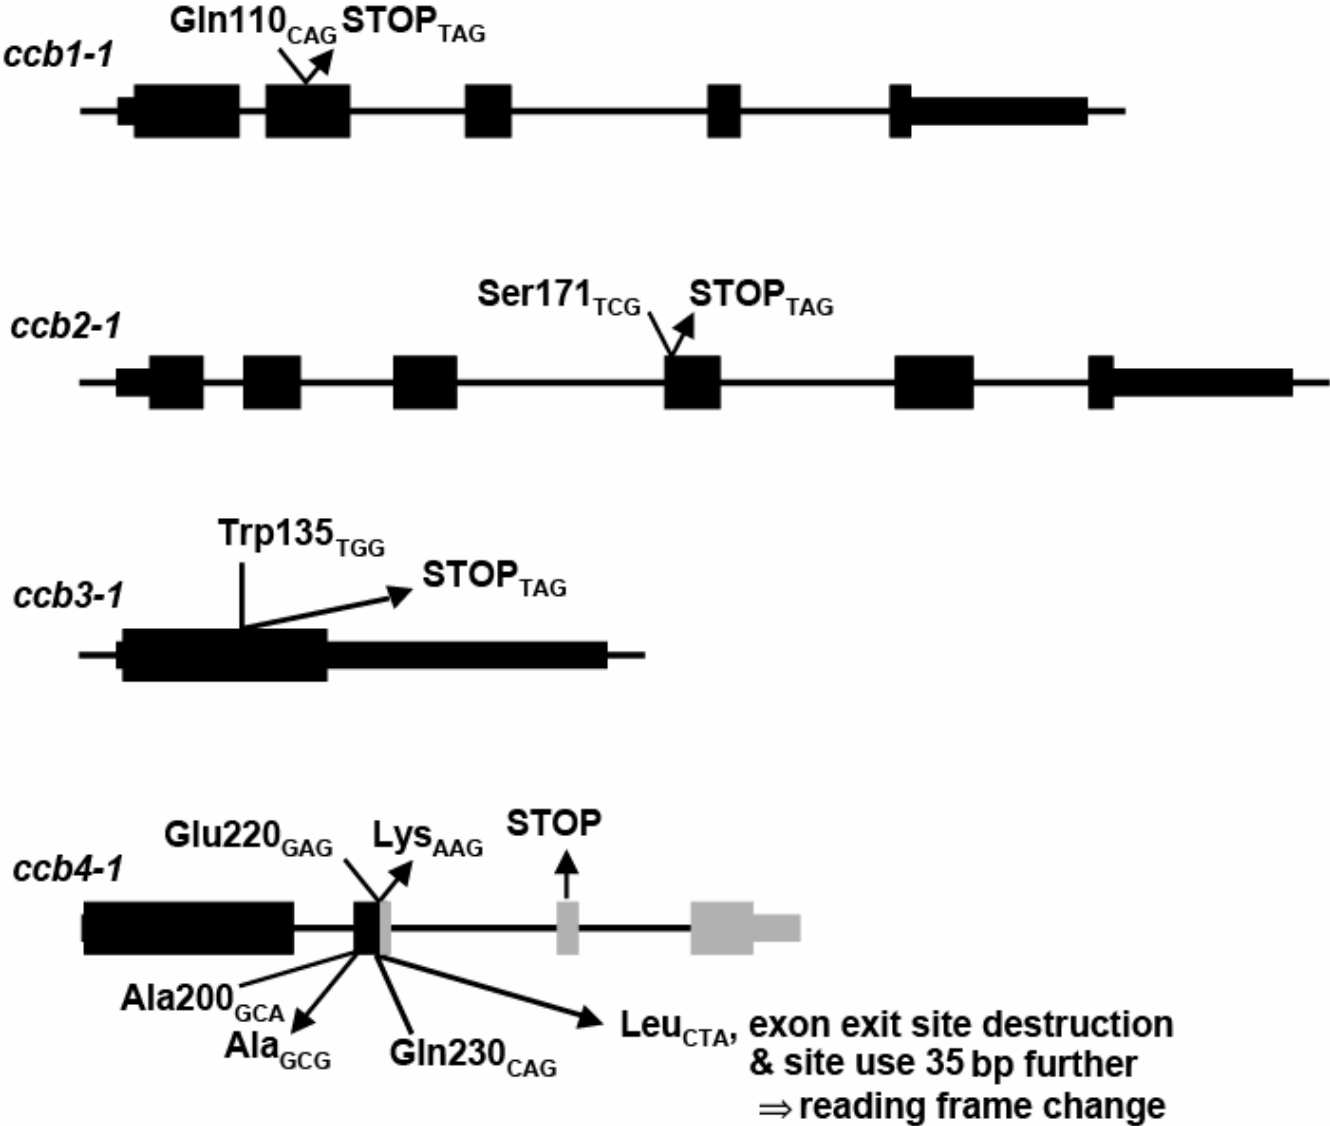

500 bp

Supplement: pnas_0702340104_1.pdf [file pnas_0702340104_1.pdf]
